# Supplementary material for: Physicochemical and catalytic properties of polysiloxane network–Pt systems
Source: Royal Society of Chemistry journal article supplement (doi:10.1039/c7ra00641a), 2017-01-01
Supplement: c7ra00641a1.pdf [file c7ra00641a1.pdf]

## **Physicochemical and catalytic properties of polysiloxane network-Pt systems**

Edyta Stochmal<sup>a\*</sup>, Joanna Strzezik<sup>b</sup>, Agnieszka Krowiak<sup>b</sup>

<sup>a</sup> Faculty of Materials Science and Ceramics, AGH–University of Science and Technology,  
Al. Mickiewicza 30, 30-059 Kraków, Poland

<sup>b</sup> Department of Chemistry, Silesian Technical University, ul. Strzody 9, 44-100 Gliwice,  
Poland

---

\* Corresponding author: Tel.: +48 12 6172845; fax: +48 12 6337161. E-mail address: [stochmal@agh.edu.pl](mailto:stochmal@agh.edu.pl).

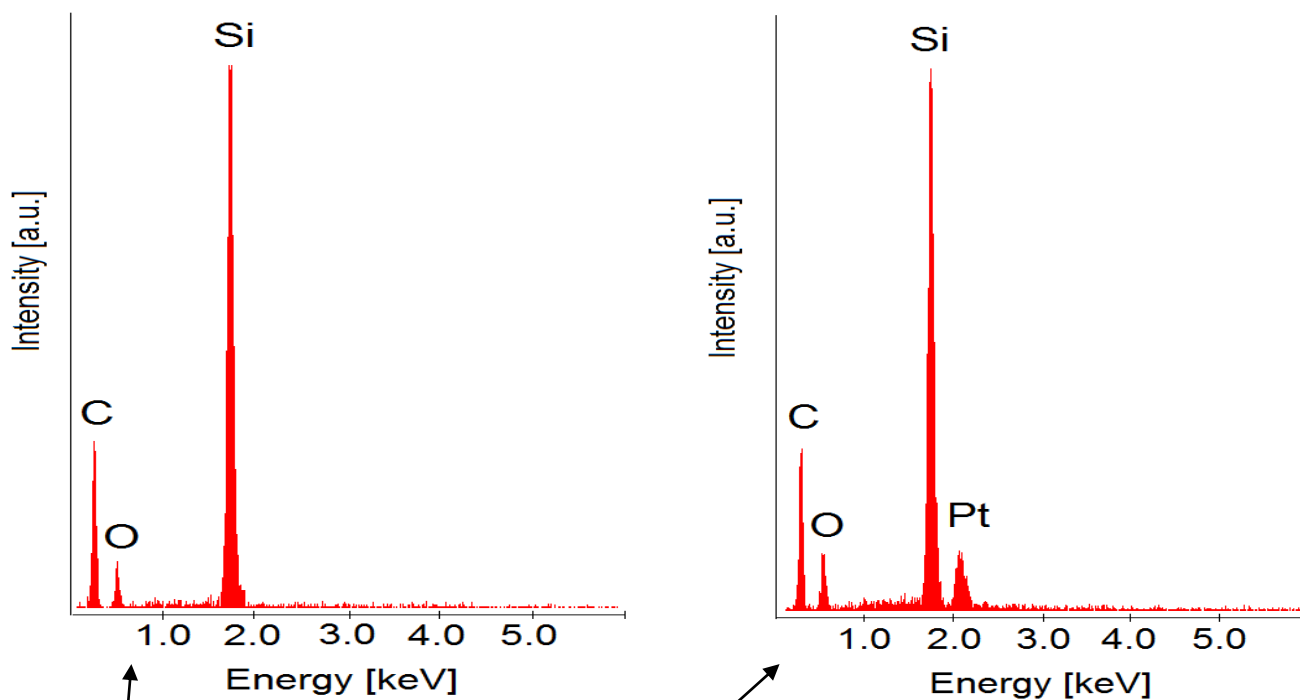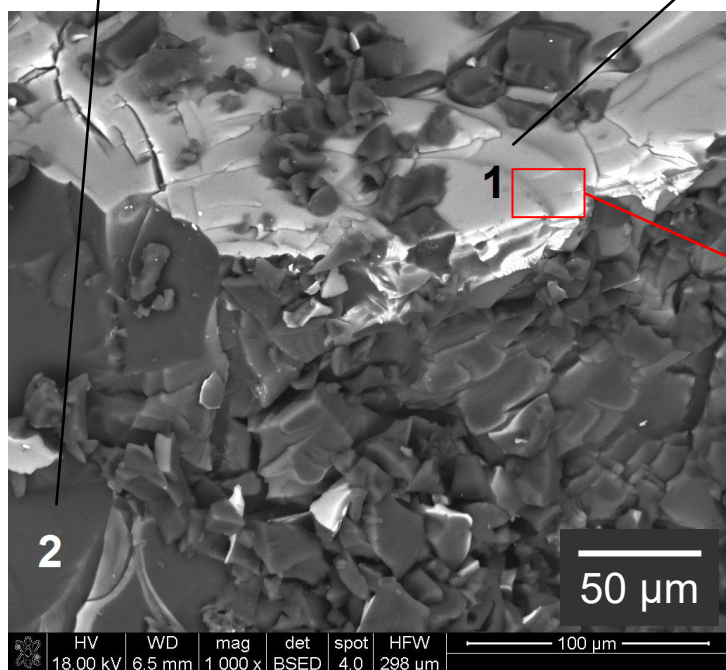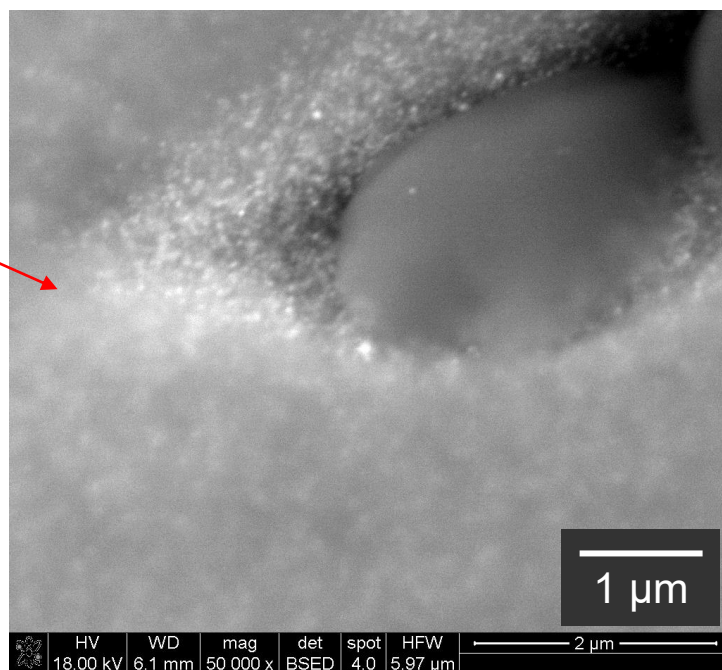

**Fig. S1** BSE images of Q-P<sub>(1:1)</sub>-Pt<sub>1.5</sub> at different magnifications (1 000x and 50 000x) and results of EDX analysis performed for selected regions of the sample

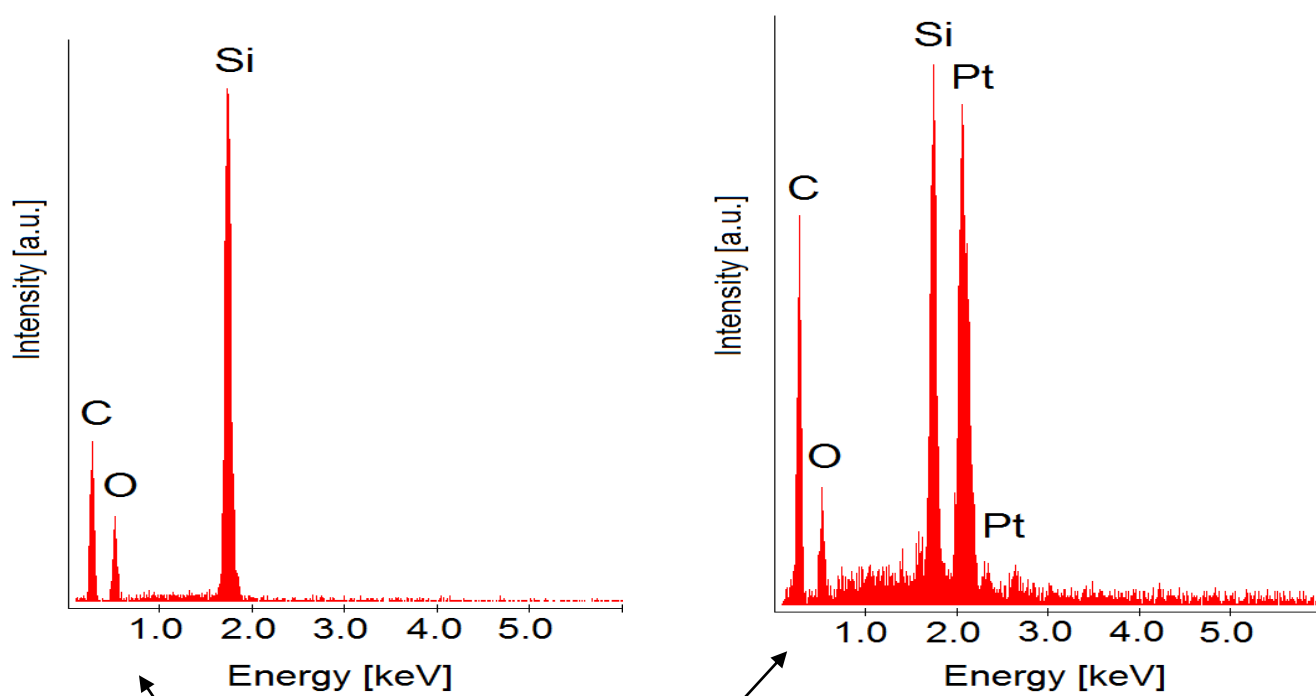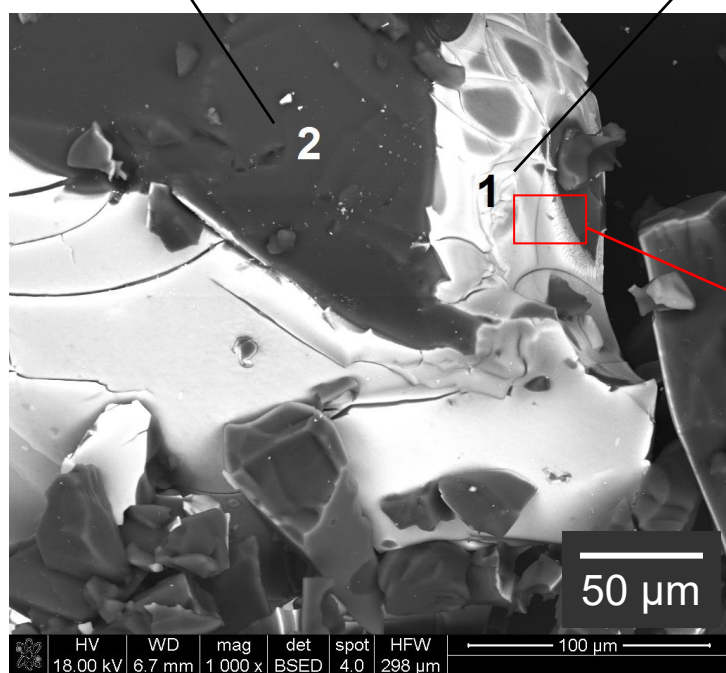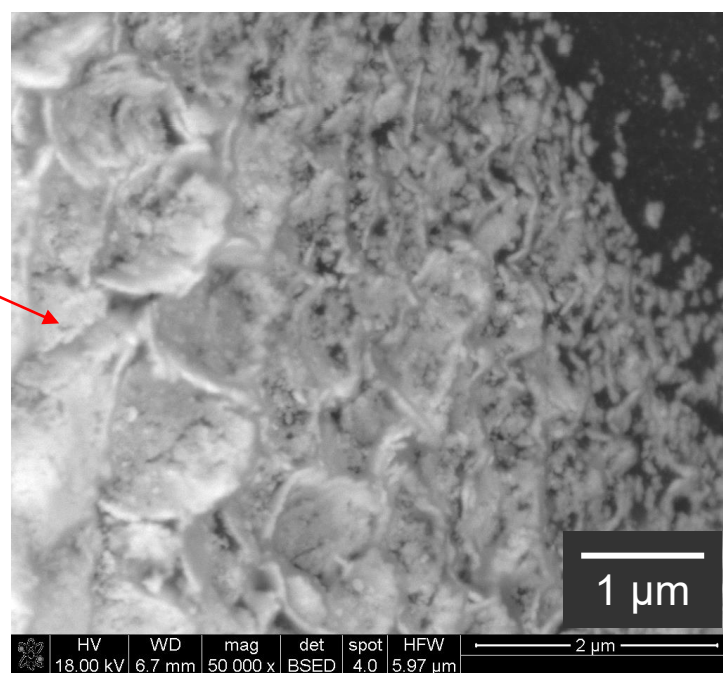

**Fig. S2** BSE images of Q-P<sub>(2:1)</sub>-Pt<sub>3</sub> at different magnifications (1 000x and 50 000x) and results of EDX analysis performed for selected regions of the sample

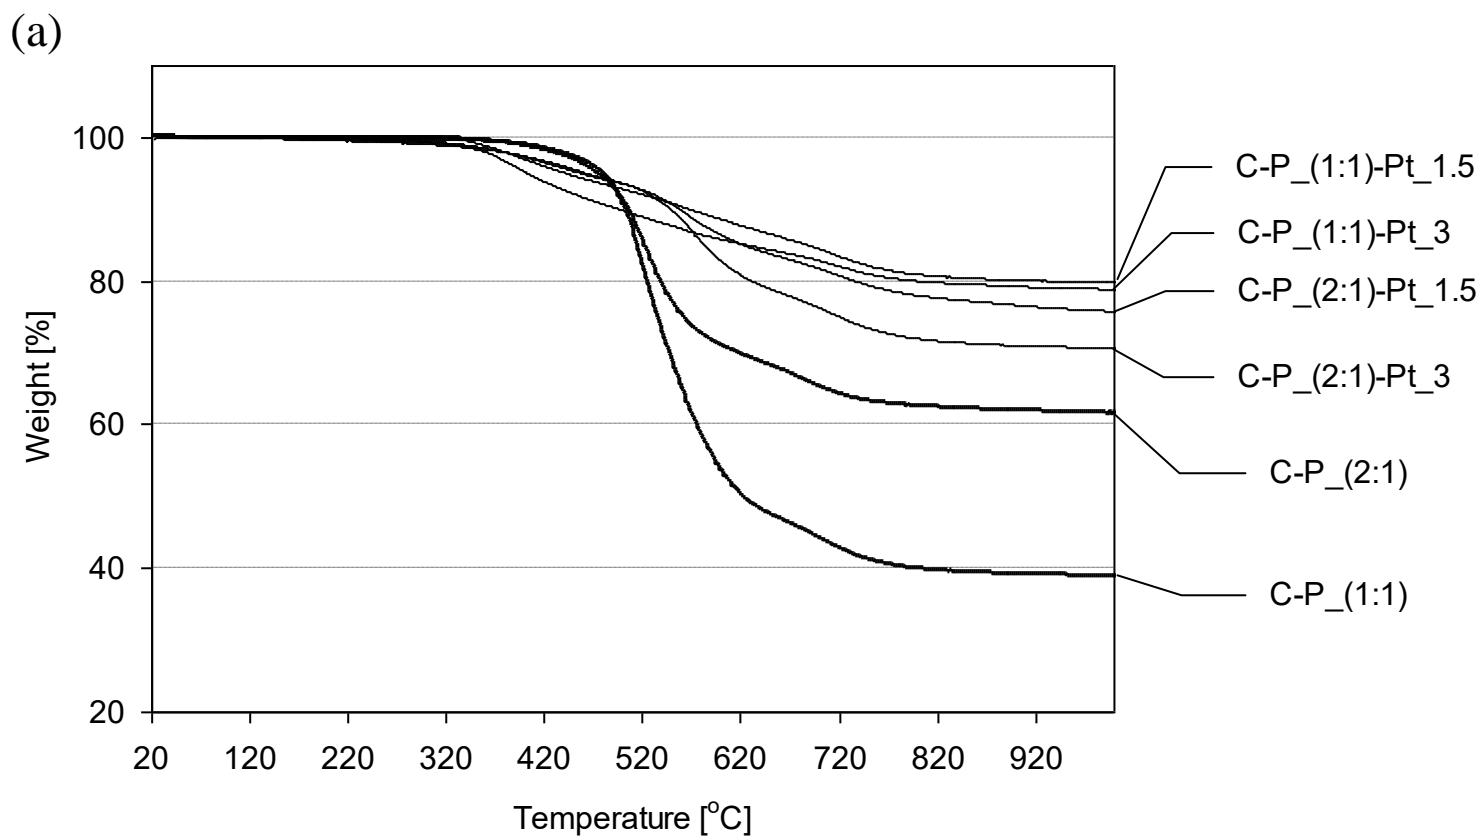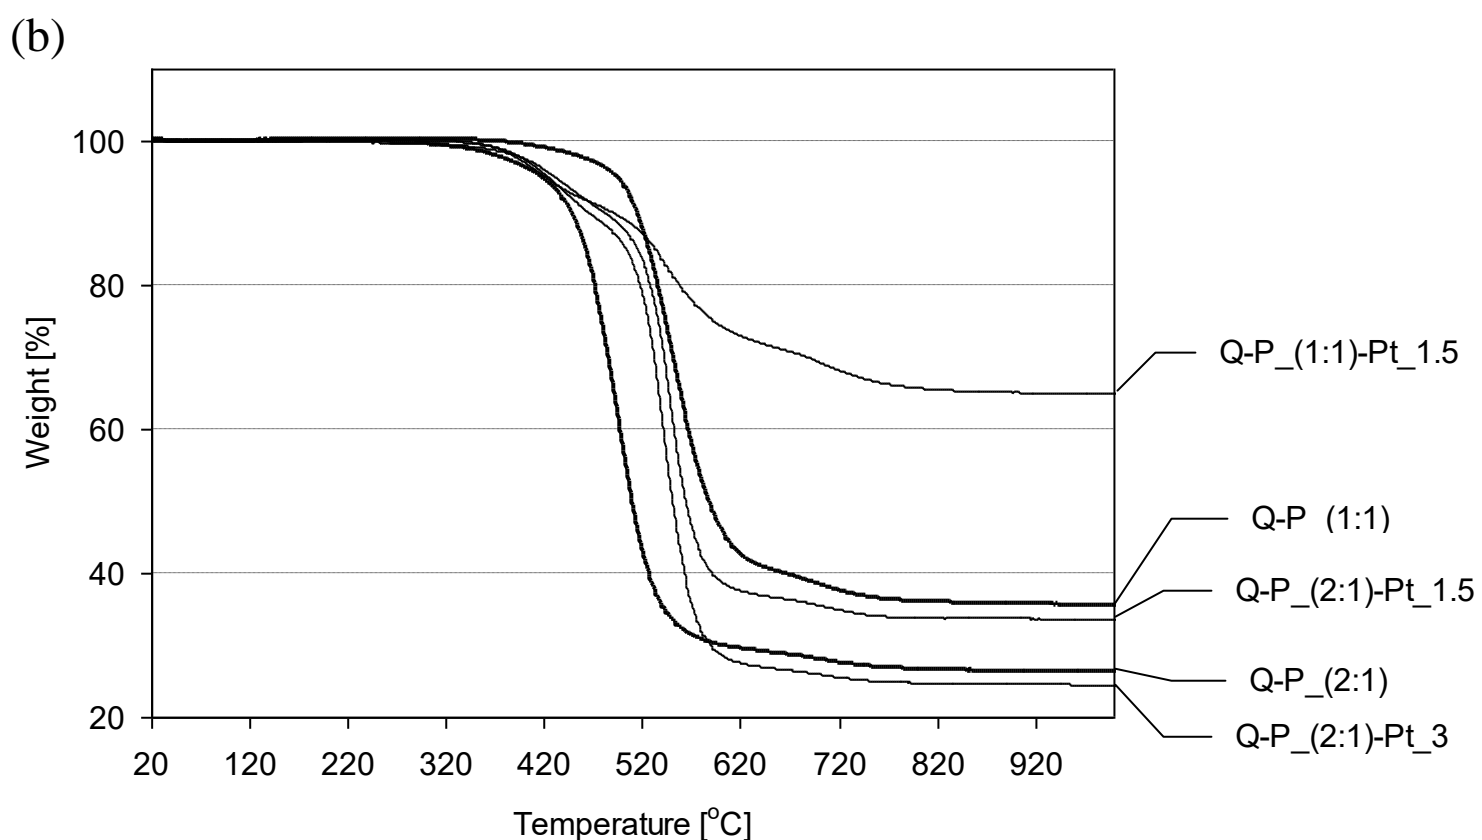

**Fig. S3.** TG curves recorded for: (a) C-P type networks and products containing Pt species, (b) Q-P type networks and products containing Pt species

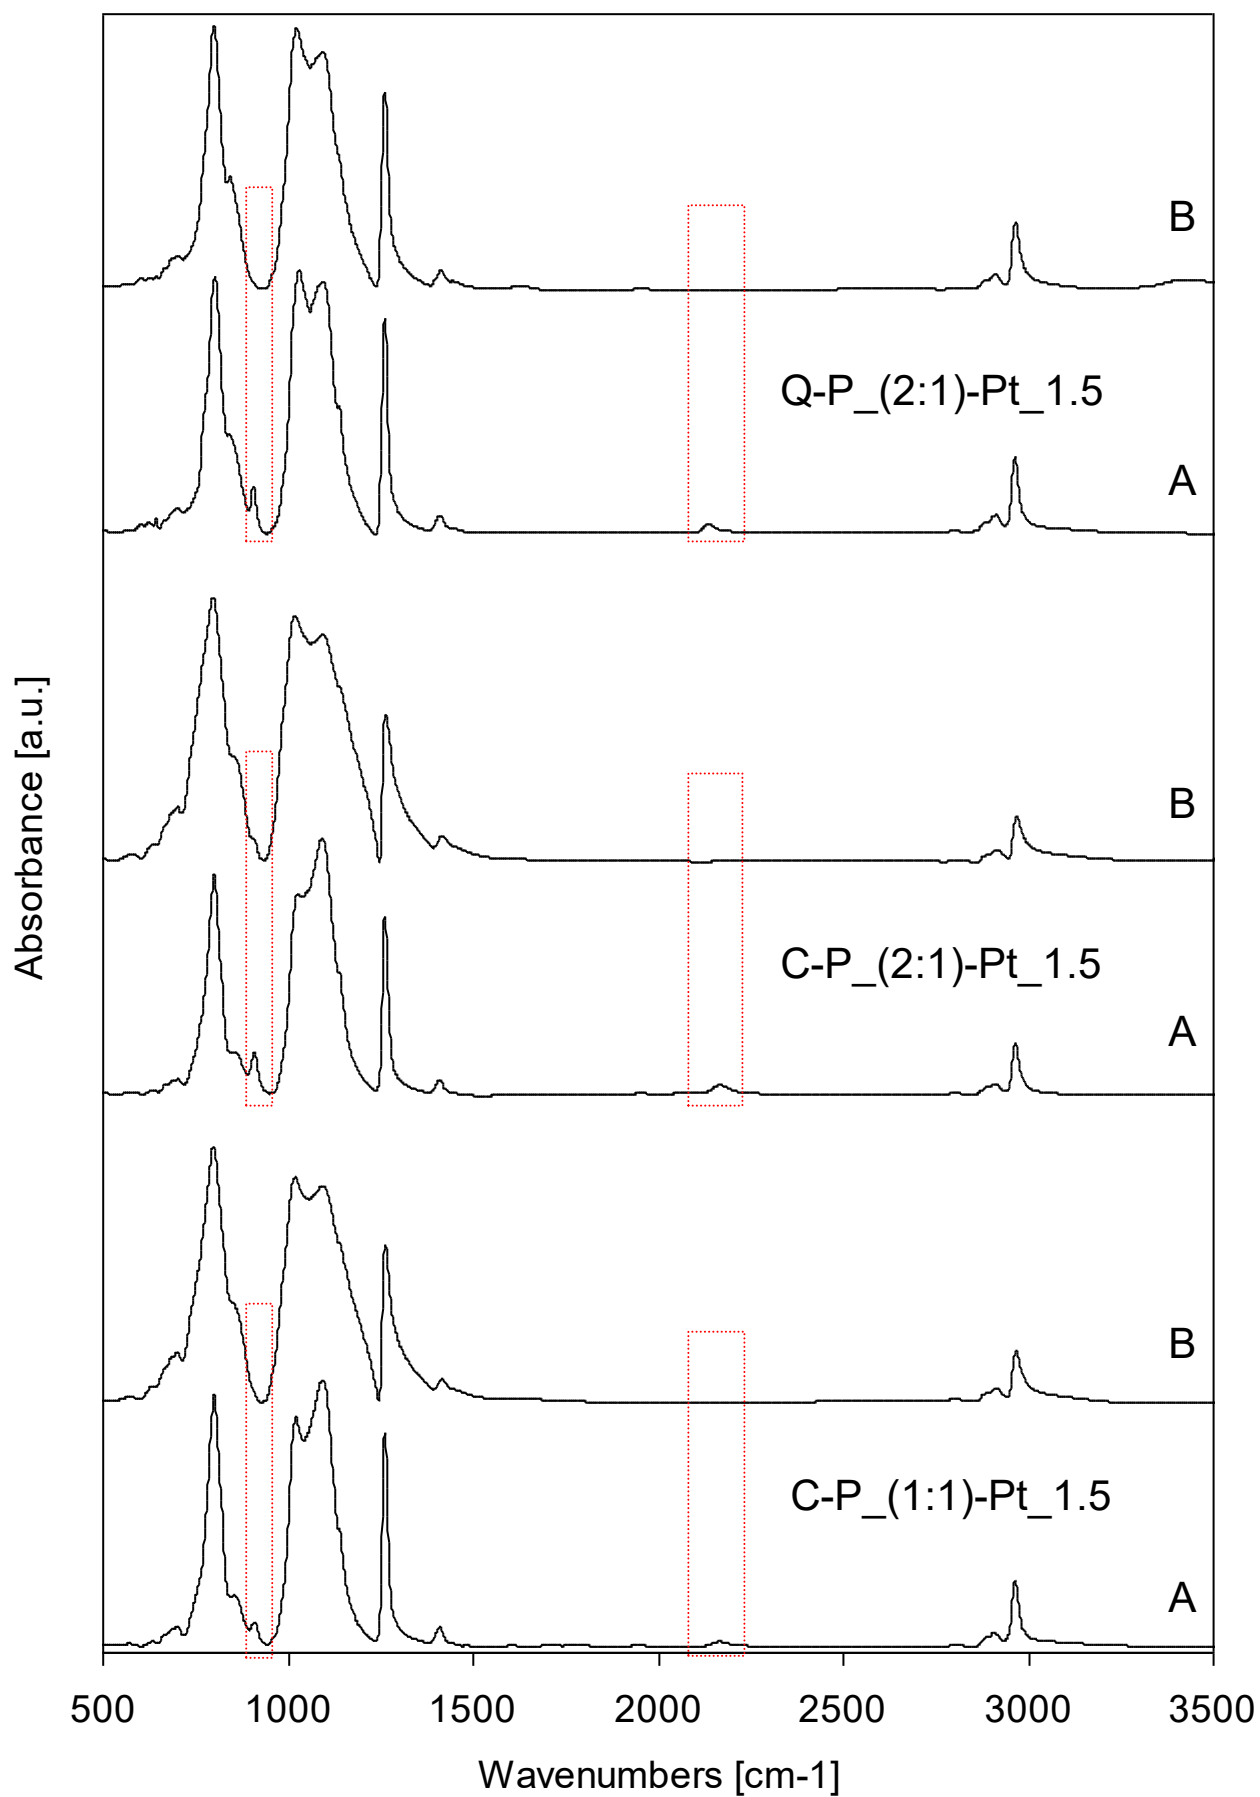

**Fig. S4.** FTIR spectra of selected networks before (A) and after (B) catalytic tests
